# Supplementary material for: Integrating Optical Genome Mapping and Whole Genome Sequencing in Somatic Structural Variant Detection
Source: MDPI journal article supplement (doi:10.3390/jpm14030291), 2024-03-09
Supplement: s1 [file s1]

## Supplementary Materials

**Supplementary Table S1.** Clinically available data of B-ALL cohort. Principal component analysis of ancestry results: AMR = admixed American, EAS = east Asian, SAS = south Asian, EUR = European.

| Individual | Leukemia Type | Self-reported race (if available) | PCA Ancestry Classification | Age (yrs) | Gender | Original cytogenetic features reported |
|------------|---------------|-----------------------------------|-----------------------------|-----------|--------|----------------------------------------|
| W0         | B-ALL         | Hisp/Mex                          | AMR                         | 10        | M      | CRLF2+ low. IKZF1del                   |
| W10        | B-ALL         | Hisp/Mex                          | AMR                         | 18        | M      | CRLF2+ high, IKZF1 del                 |
| W31        | B-ALL         | Hisp/Mex                          | AMR                         | 10        | M      | CRLF2+ IKZF1 wt                        |
| W13        | B-ALL         | Hisp/Mex                          | AMR                         | 18        | M      | CRLF2- IKZF1 wt                        |
| G02        | B-ALL         | Hisp/Mex                          | AMR                         | 9         | F      | CRLF2+ CD34+                           |
| E13        | B-ALL         | Hisp/Mex                          | AMR                         | 6         | F      | CRLF2+ CD34+                           |
| K30        | B-ALL         | Hisp/Mex                          | AMR                         | 12        | F      | CRLF2+ CD34+&CD34-                     |
| K09        | B-ALL         | Hisp/Mex                          | AMR                         |           | F      |                                        |
| PAVDRS     | B-ALL         |                                   | AMR                         | 9         | M      | IGH-EPOR, CDKN2A, IKZF1, PAX5          |
| ALL4364    | B-ALL         |                                   | AMR                         | 4         | M      | JAK2 R683G, IGH-CRLF2                  |
| PAWFUU     | B-ALL         |                                   | AMR                         | 18        | F      | RANBP2-ABL1                            |
| PAVCYL     | B-ALL         |                                   | AMR                         | 8         | M      | ZMIZ1-ABL1                             |
| G2650      | B-ALL         |                                   | AMR                         | >20       | M      |                                        |
| LAX7       | B-ALL         |                                   | AMR                         | >20       | M      | IKZF1 del CD10+CD19+                   |
| ICN1       | B-ALL         |                                   | EAS                         | 14        | F      | BCR-ABL1                               |
| ALL-17     | B-ALL         |                                   | EAS                         | 8         | F      |                                        |
| PAVVIE     | B-ALL         |                                   | EUR                         | 5         | M      | NUP153-ABL1                            |
| PVCRK      | B-ALL         |                                   | EUR                         | >20       | M      | IGH-EPOR, CDKN2A, IKZF1, JAK2          |
| ALL-07     | B-ALL         |                                   | EUR                         | 7         | M      |                                        |
| ALL-11     | B-ALL         |                                   | EUR                         | 3         | F      |                                        |
| ALL-19     | B-ALL         |                                   | EUR                         | 16        | M      |                                        |
| ALL-25     | B-ALL         |                                   | EUR                         | 12        | M      |                                        |
| ALL-53     | B-ALL         |                                   | EUR                         | 7         | F      |                                        |
| ALL-57     | B-ALL         |                                   | EUR                         | 5         | F      |                                        |
| ALL-59     | B-ALL         |                                   | EUR                         | 13        | F      |                                        |
| ALL-82     | B-ALL         |                                   | EUR                         | 5         | F      |                                        |
| ALL-02     | B-ALL         |                                   | EUR                         | 5         | F      |                                        |
| ALL-58     | B-ALL         |                                   | EUR                         | 2         | F      |                                        |
| MXP3       | B-ALL         |                                   | SAS                         | 13        | M      |                                        |

**Supplementary Table S2.** Comparison of WGS, OGM, Karyotyping, FISH, and RNA-Seq techniques for detection of SVs.

| Variant type           | WGS   | OGM     | Karyotype | FISH     | RNA-Seq              |
|------------------------|-------|---------|-----------|----------|----------------------|
| SNV                    | ✓     | N/A     | N/A       | N/A      | ✓                    |
| Deletion               | ✓     | >500 bp | >5-10 Mb  | targeted | Expression-dependent |
| Duplication            | ✓     | >500 bp | >5-10 Mb  | targeted | Expression-dependent |
| Inversion              | ✓     | >500 bp | >5-10 Mb  | targeted | Expression-dependent |
| Insertion              | small | >500 bp | >5-10 Mb  | targeted | Expression-dependent |
| Translocation          | ✓     | >500 bp | >5-10 Mb  | targeted | Expression-dependent |
| Aneuploidy             | ✓     | ✓       | ✓         | targeted | Expression-dependent |
| Repeat expansion       | N/A   | ✓       | N/A       | N/A      | N/A                  |
| Loss of heterozygosity | ✓     | ✓       | N/A       | N/A      | Expression-dependent |

**Supplementary Table S3.** Novel putative gene-fusion events identified by WGS, OGM, or both. Novel fusions were not reported in ChimerDB 4.0, FusionGDB 2.0 databases or manual literature curation.

| Fusion genes     | Putative novel: not in FusionGDB, ChimerDB, or lit search | Previously reported | RNA-Seq expression ( $\geq 16$ supporting reads) | Fusion genes (contd.) | Putative novel (contd.) | Previously reported (contd.) | RNA-Seq expression (contd.) |
|------------------|-----------------------------------------------------------|---------------------|--------------------------------------------------|-----------------------|-------------------------|------------------------------|-----------------------------|
| ABL1::NUP214     |                                                           | ✓                   | ✓                                                | NCOA7::PHF20          | ✓                       |                              |                             |
| ABL1::ZMIZ1      |                                                           | ✓                   | ✓                                                | NKD2::ZCCHC16         | ✓                       |                              |                             |
| ACOT13::SYN3     |                                                           | ✓                   |                                                  | NR3C1::DNM2           | ✓                       |                              | ✓                           |
| AGPAT4::PARK2    |                                                           | ✓                   |                                                  | PADI1::DCHS2          | ✓                       |                              |                             |
| ARL8B::EDEM1     | ✓                                                         |                     |                                                  | PAGE2B::PAGE2         | ✓                       |                              |                             |
| AUTS2::PAX5      |                                                           | ✓                   |                                                  | PAIP2B::FAM65B        | ✓                       |                              |                             |
| BANP::PRKACA     | ✓                                                         |                     | ✓                                                | PBX1::TCF3            |                         | ✓                            |                             |
| BAZ2A::FSIP1     |                                                           | ✓                   |                                                  | PDGFRB::EBF1          |                         | ✓                            |                             |
| BMP1::SAXO2      | ✓                                                         |                     |                                                  | PIGK::AK5             | ✓                       |                              | ✓                           |
| C12orf79::RNF17  | ✓                                                         |                     |                                                  | PRAMEF11::PRAMEF10    | ✓                       |                              |                             |
| C7orf72::IKZF1   | ✓                                                         |                     |                                                  | RADIL::MMD2           |                         | ✓                            |                             |
| CADPS2::VPS13A   | ✓                                                         |                     |                                                  | RAG1::C11orf74        | ✓                       |                              |                             |
| CLOCK::SLC9B1    | ✓                                                         |                     |                                                  | RB1::RCBTB2           |                         | ✓                            |                             |
| CMPK1::CLIC5     |                                                           | ✓                   |                                                  | RGPD6::RGPD5          |                         | ✓                            | ✓                           |
| CXorf23::MAP7D2  | ✓                                                         |                     |                                                  | RGPD6::RGPD8          |                         | ✓                            |                             |
| DCDC5::ATRX      |                                                           | ✓                   |                                                  | RNASE13::CHD8         | ✓                       |                              |                             |
| DCLRE1C::ACBD7   | ✓                                                         |                     |                                                  | SAFB::CATSPERD        | ✓                       |                              |                             |
| DDX10::MRPL57    |                                                           | ✓                   |                                                  | SCD5::PCBD2           | ✓                       |                              |                             |
| DOCK8::TMEM38B   | ✓                                                         |                     | ✓                                                | SENP6::PTPRK          | ✓                       |                              | ✓                           |
| DPP10::SET       | ✓                                                         |                     |                                                  | SPAG17::OSBPL10       | ✓                       |                              |                             |
| ETV6::RUNX1      |                                                           | ✓                   | ✓                                                | SPOCK1::ETV6          | ✓                       |                              |                             |
| FXR1::ATAD2      | ✓                                                         |                     | ✓                                                | SPTBN1::CYB5D2        | ✓                       |                              |                             |
| GPR56::CCDC135   |                                                           | ✓                   |                                                  | TACC1::HTRA4          | ✓                       |                              |                             |
| HLF::TCF3        |                                                           | ✓                   | ✓                                                | TMEM217::KMT5B        | ✓                       |                              | ✓                           |
| IKZF1::DDC       |                                                           | ✓                   | ✓                                                | TRPM7::SPPL2A         |                         | ✓                            |                             |
| ITPR2::TMTC1     |                                                           | ✓                   |                                                  | UBR4::ZFP37           |                         | ✓                            |                             |
| KCTD5::SRRM2     |                                                           | ✓                   |                                                  | WAC::NRBF2            | ✓                       |                              |                             |
| KIF18A::PRKACA   | ✓                                                         |                     |                                                  | WDHD1::SMEK1          | ✓                       |                              |                             |
| KLF6::LINC00704  | ✓                                                         |                     |                                                  | WDR70::NXPH1          | ✓                       |                              |                             |
| LETM2::ADAM5     |                                                           | ✓                   |                                                  | ZFP14::ZNF529         | ✓                       |                              |                             |
| LHPP::FAM175B    | ✓                                                         |                     |                                                  | ZNF415::ZNF665        | ✓                       |                              |                             |
| LINC02250::GRIK1 | ✓                                                         |                     |                                                  | ZSCAN26::ZKSCAN3      | ✓                       |                              |                             |
| LRP1B::KCND2     | ✓                                                         |                     |                                                  |                       |                         |                              |                             |
| MAP3K6::SERINC2  | ✓                                                         |                     |                                                  |                       |                         |                              |                             |

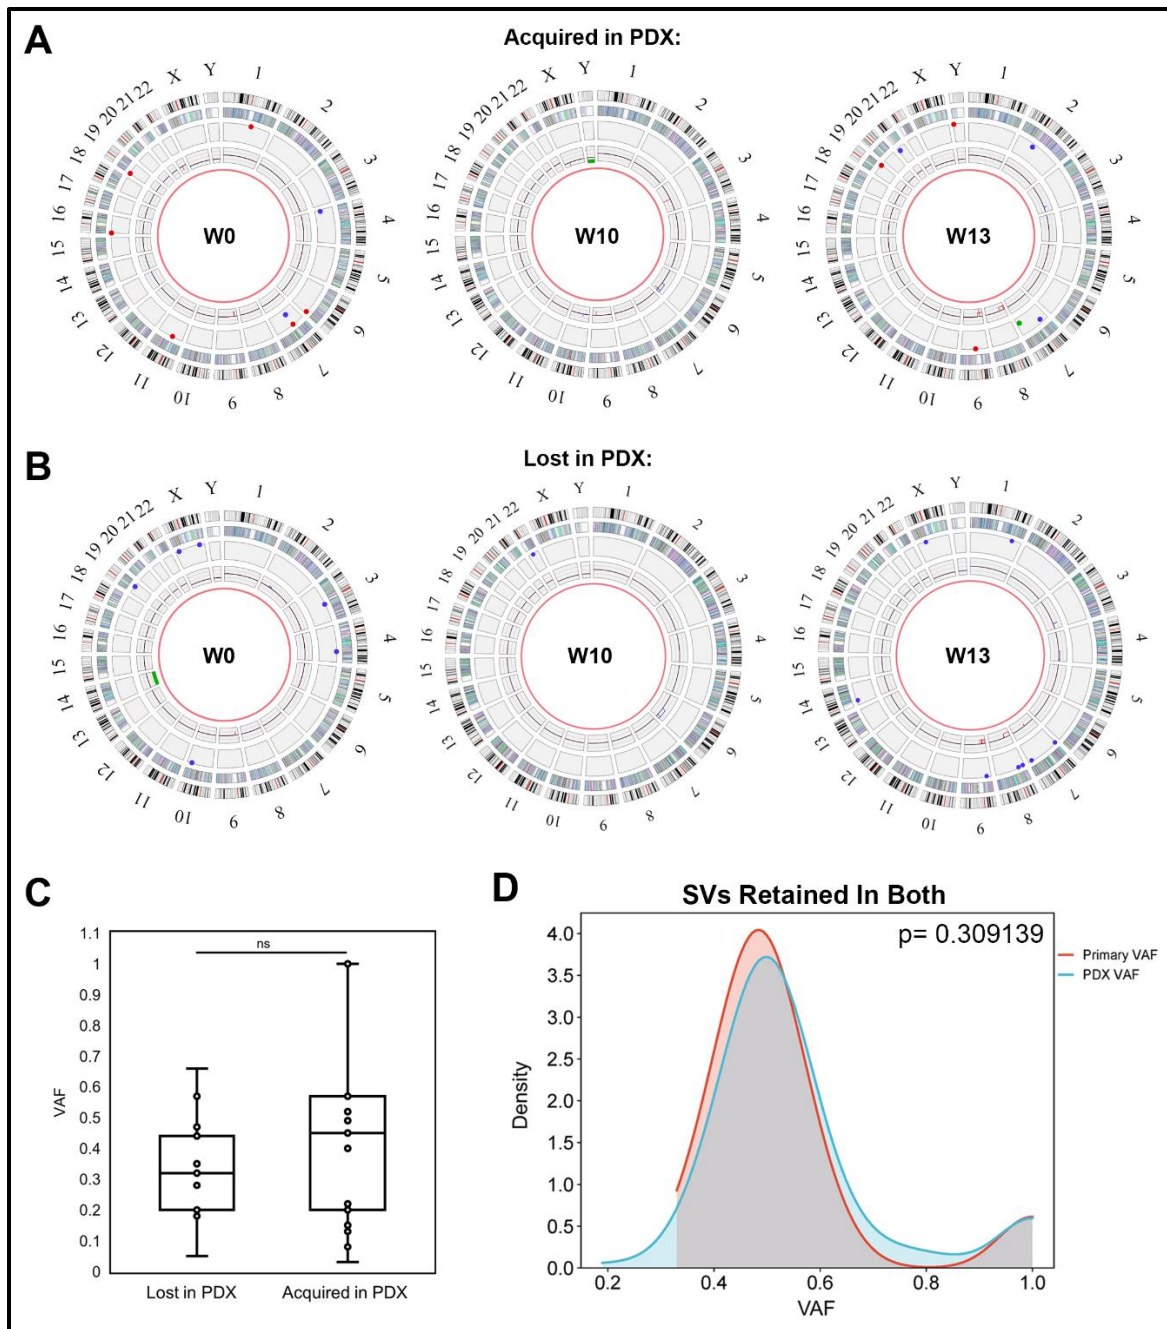

**Supplementary Figure S1** Comparison of SVs in patient primary tumor and expanded PDX model from Bionano de novo analysis:

**(A)** Circos plots of SVs acquired in PDX model. SVs were originally not present/detectable in primary tumor but present/detectable in PDX. Track labels are as follows from outside to inside: chromosome number, cytoband, gene regions, SV (blue=deletion, red=insertion, pink=inversion, green=duplication), copy number, translocations. **(B)** Circos plots of SVs lost in PDX model, originally present/detectable in primary tumor, but not in PDX model. **(C)** Variant allele frequencies of SVs either lost or acquired in the PDX model compared to the primary tumor. Middle line represents median ( $p=0.13456$ , two-tailed T-test.) **(D)** Density plot representing variant allele frequencies of SVs retained in both patient primary tumor and PDX model ( $p=0.309139$ , two-tailed T-test).

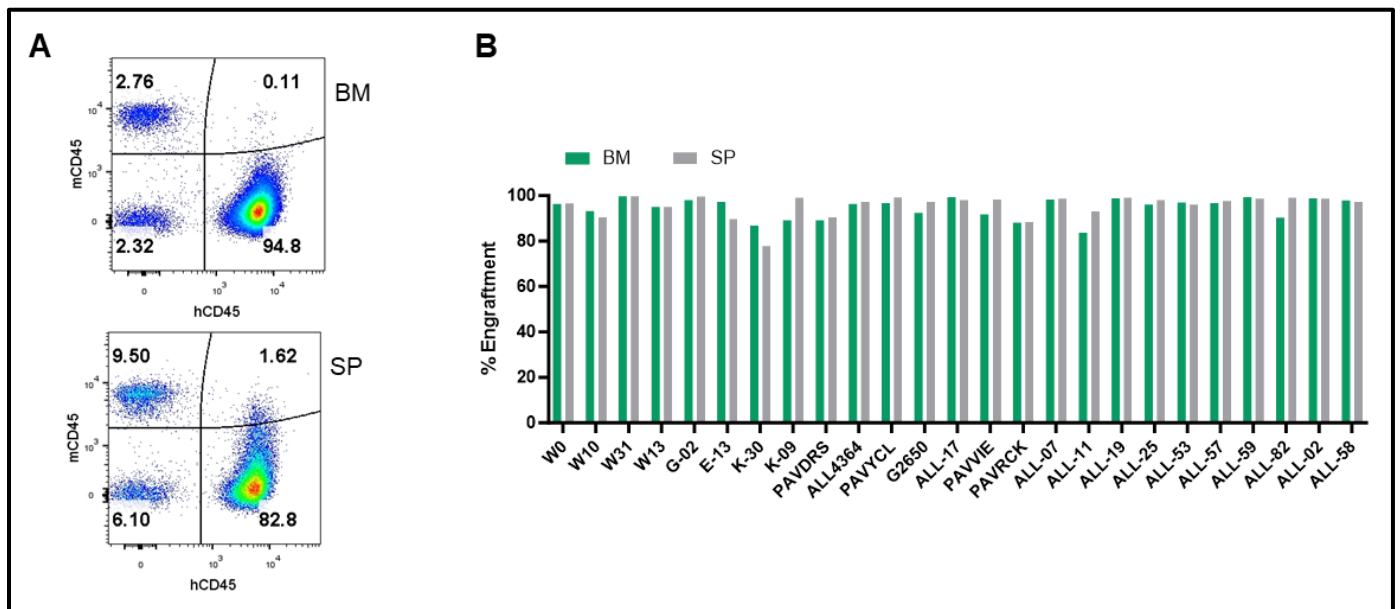

**Supplementary Figure S2** Human CD45 cell engraftment in animal Bone marrow (BM) and Spleens (SP). Mice were terminated when sick or moribund post-injection of human cells or PDXs and their BM and SP were harvested. After tissue cell dissociation and processing, single cells were stained for mCD45 and hCD45. **(A)** A representative flow dot plot of BM (top) and SP (bottom) from PDX E-13 is shown. **(B)** The human CD45 cell engraftment data based on staining of mCD45 and hCD45 are presented in the bar graph. Human cell engraftment is defined as the percentage of human CD45+ cells divided by the percentage of total mouse and human CD45+ cells multiplied by 100.
